# Supplementary material
Source: PubMed Central journal article supplement (PMC2664037)
Supplement: 0808012106_0808012106SI.pdf [file 0808012106_0808012106SI.pdf]

# Supporting Information

Guo et al. 10.1073/pnas.0808012106

## SI Text: How much variation will selective sweeps remove in *C. rubella*?

We first make a rough estimate of the population recombination rate in *C. rubella*. We cannot directly use the shared polymorphism between *C. rubella* and *C. grandiflora*, since for such variation we do not know whether recombination events have occurred in *C. rubella* or in the ancestral species of *C. rubella* and *C. grandiflora*. We have therefore collected only the segregating sites private to *C. rubella* around the S-locus (see Fig. S4). From this dataset we can estimate (assuming the infinite sites model and using the 4-gamete test) at least 4 recombination events in <100 kb to the S-locus on either side (and at least 1 recombination event in the SRK). There is also evidence for recombination events between this core 200-kb region and the genes at distances of 500–1,000 kb on either side. One can translate the minimal number of recombination events into an (arguably very rough) estimator of the scaled recombination rate,  $\rho$ , which is

$\approx 20$  for the 200-kb region (1). If we assume an effective population size of rubella of  $\approx 10,000$ , then this corresponds to an estimated rate of 0.5 cM/Mb.

Thus, we would not expect a selective sweep of  $s = 10\%$  to sweep variation from a region much more than  $r = 0.0005$  (corresponding to  $r/s = 0.05$ ) (see ref. 2). For the S-locus region with the above estimated rate, this corresponds to 0.5 cM or 1 Mb. Note that this is a very strong selective sweep (a sweep of 1% would affect only 100 kb) and that our estimate of the recombination rate is likely to be an underestimate, since not all variation in the region has been surveyed. If recombination rates are similar or higher at other locations across the *C. rubella* genome, sweeps would be expected to affect similar or smaller regions. Therefore, we would need to invoke multiple, localized sweeps to explain the reduction of diversity at several additional loci unlinked to each other and the S locus. We argue that a more parsimonious explanation is that a bottleneck caused the reduction in diversity at both the S locus and unlinked loci.

1. Hudson RR (1987) Estimating the recombination parameter of a finite population model without selection. *Genet Res* 50:245–250.

2. Santiago E, Caballero A (2005) Variation after a selective sweep in a subdivided population. *Genetics* 169:475–483.

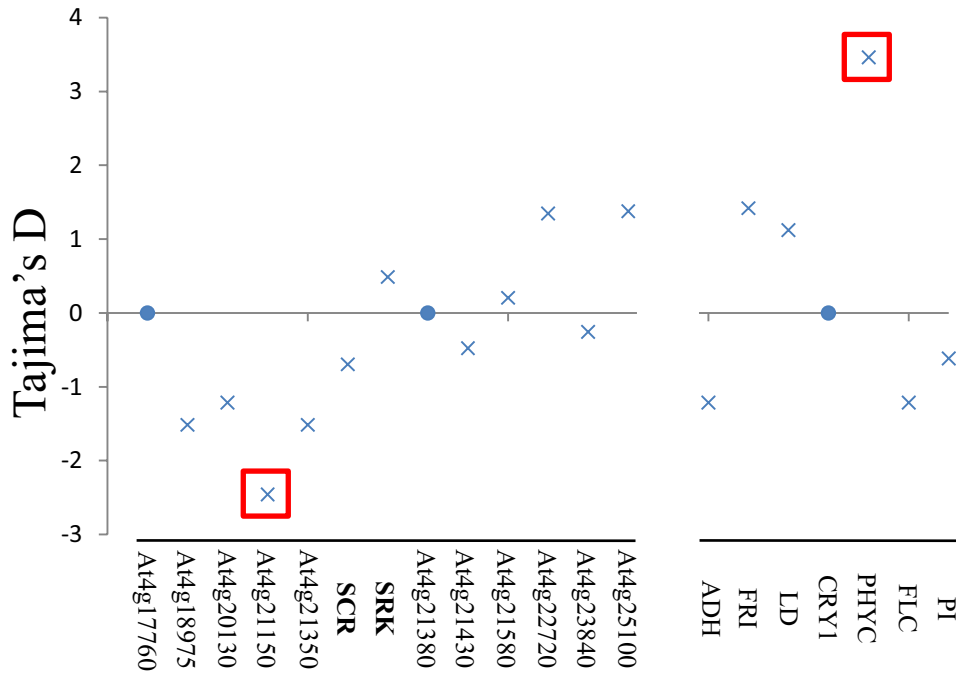

Fig. S1. Tajima's D values in *C. rubella* for 20 gene fragments. Three fragments had no variation (indicated with blue dots), and the 2 with significant values ( $P < 0.05$ ) are boxed in red.

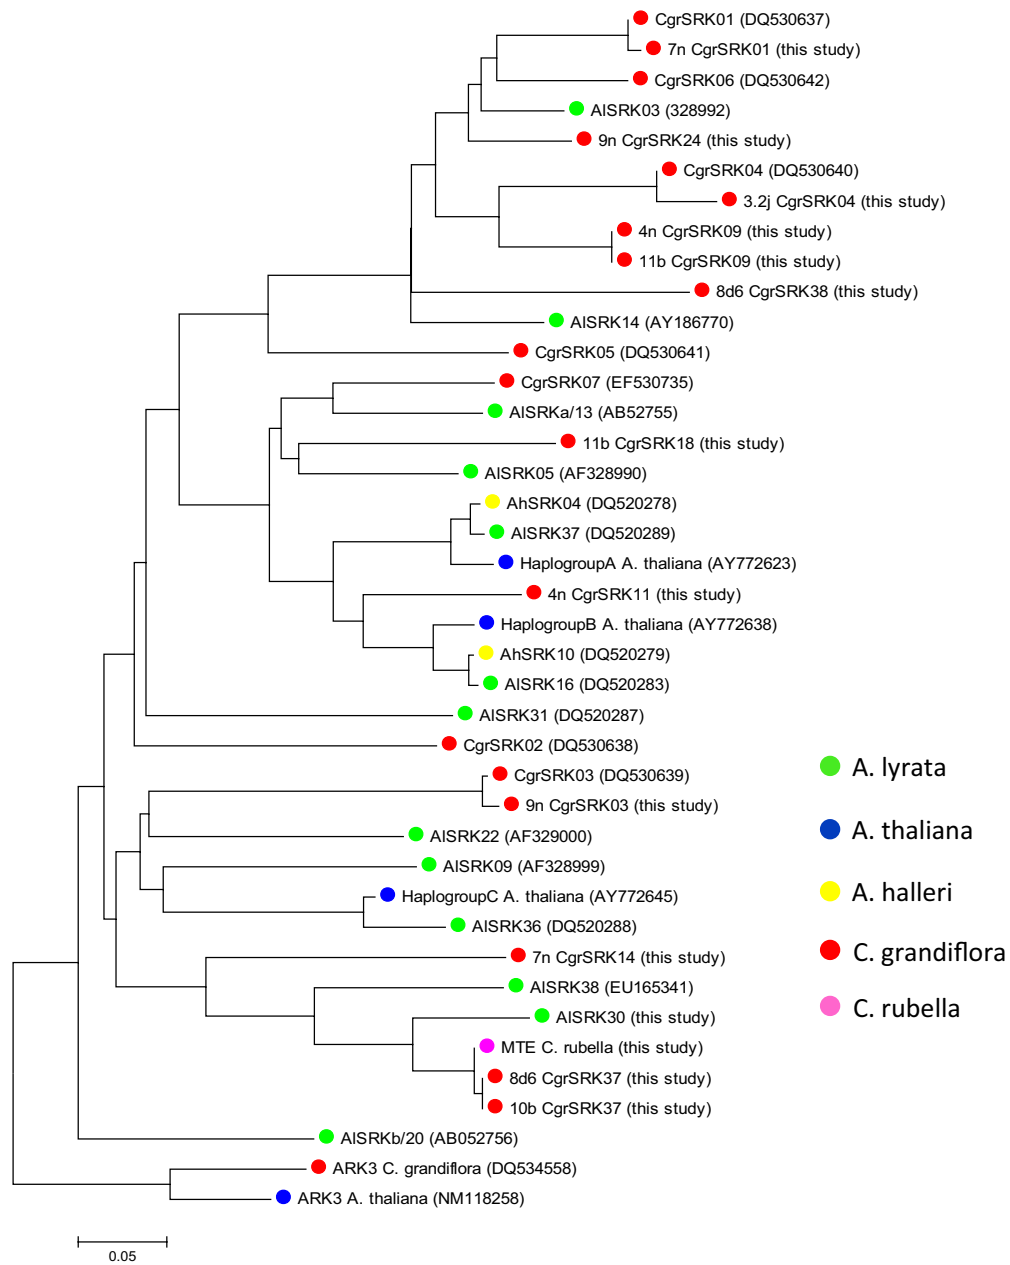

Fig. S2. Phylogenetic tree of SRK alleles in *Arabidopsis* and *Capsella*. GenBank accession numbers in parentheses.

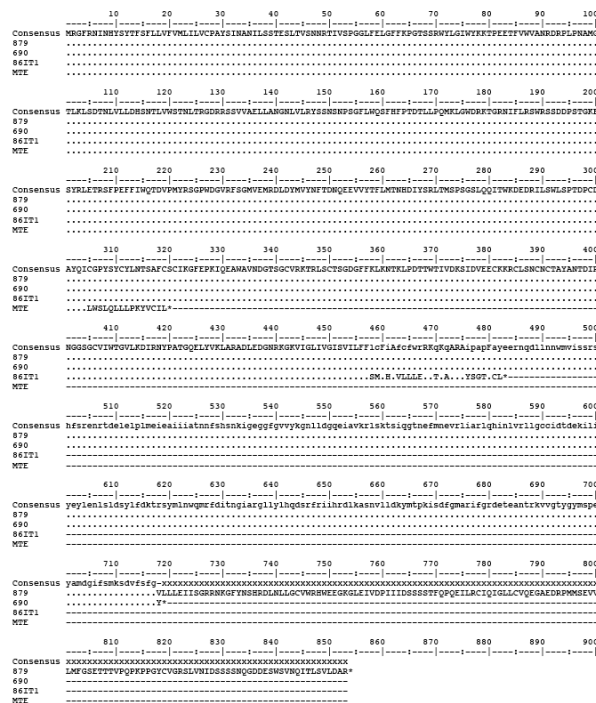

Fig. S3. Alignment of SRK amino acid sequences from *C. rubella*. Dots indicate identical amino acid as consensus, asterisk indicate stop codons.

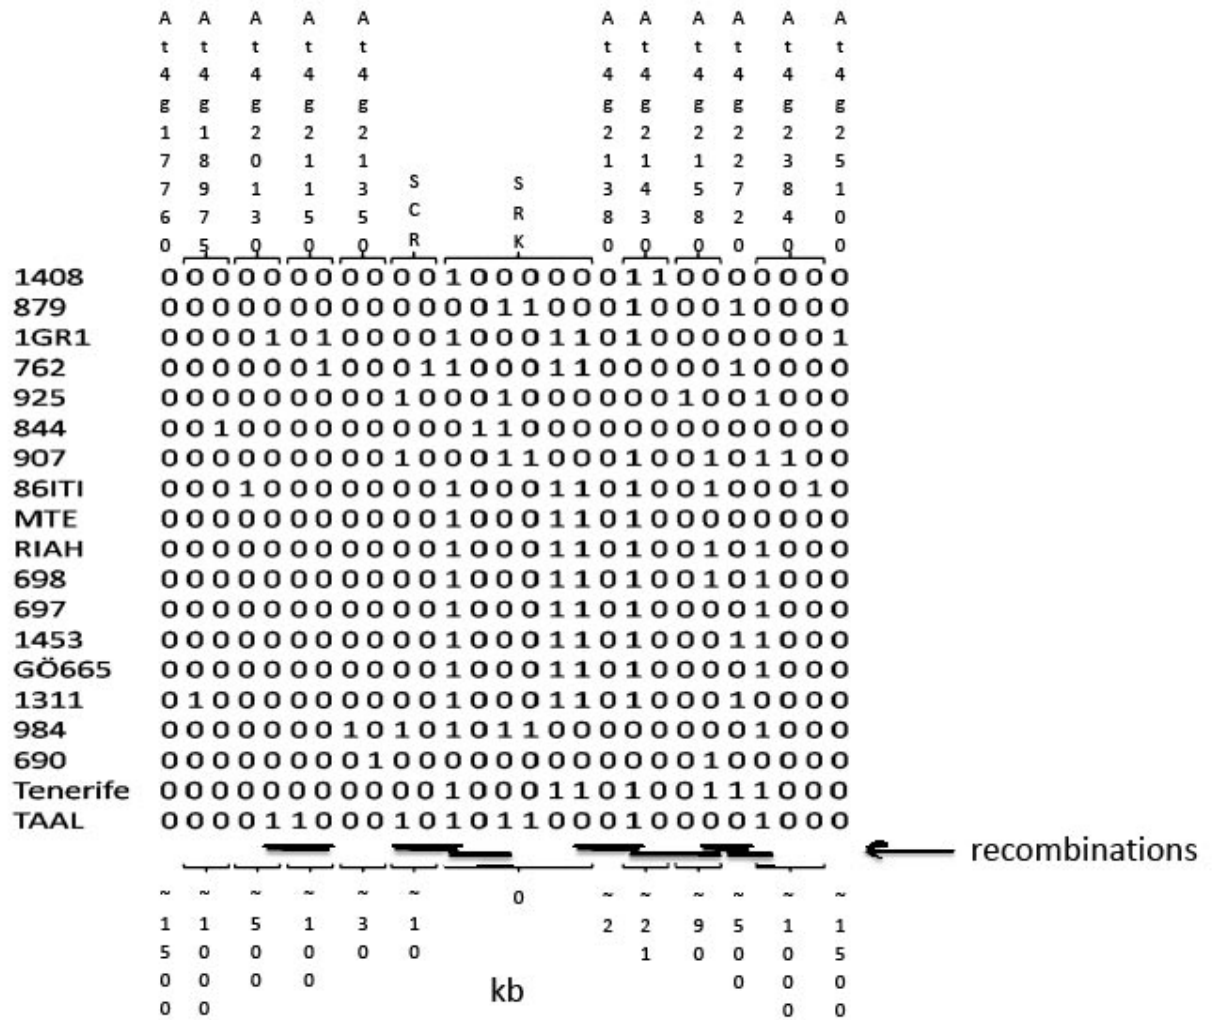

**Fig. S4.** Segregating sites private to *C. rubella*. 0 denotes the ancestral variant, 1 the derived variant. On top are the locus names (for genes with most variation shared with *C. grandiflora*), on bottom is the distance to the S-locus in kilobases, and to the left the accession names. Black horizontal bars indicate a recombination event as inferred by the 4-gamete test (DNAsp).

**Table S1. Samples studied**

| Species               | Accessions                    | Origin           | Latitude/Longitude |               |
|-----------------------|-------------------------------|------------------|--------------------|---------------|
| <i>C. grandiflora</i> | 3                             | Greece           | +39.40/+19.46      |               |
|                       | 4                             | Greece           | +39.45/+19.52      |               |
|                       | 7                             | Greece           | +38.46/+20.59      |               |
|                       | 8                             | Greece           | +38.52/+20.59      |               |
|                       | 9                             | Greece           | +39.53/+20.44      |               |
|                       | 10                            | Greece           | +39.52/+20.46      |               |
|                       | 11                            | Greece           | +39.52/+20.42      |               |
|                       | <i>C. rubella</i>             | 690              | Spain              | +36.15/−5.58  |
|                       |                               | 697              | Italy              | ?             |
|                       |                               | 698              | Italy              | ?             |
|                       |                               | 762              | Greece             | +37.58/+23.43 |
| 844                   |                               | Greece           | ?                  |               |
| 879                   |                               | Greece           | +35.29/+24.42      |               |
| 907                   |                               | Greece           | +39.40/+19.48      |               |
| 925                   |                               | Greece           | +39.40/+20.51      |               |
| 984                   |                               | Spain            | +39.30/+3.00       |               |
| 1,204                 |                               | Spain (Tenerife) | +28.19/−16.34      |               |
| 1,207                 |                               | Spain (Tenerife) | +28.19/−16.34      |               |
| 1,208                 |                               | Spain (Tenerife) | +28.19/−16.34      |               |
| 1,209                 |                               | Spain (Tenerife) | +28.19/−16.34      |               |
| 1,215                 |                               | Spain (Tenerife) | +28.19/−16.19      |               |
| 1,311                 |                               | France           | +42.53/−0.06       |               |
| 1,377                 |                               | Argentina        | −34.40/−58.30      |               |
| 1,408                 |                               | Greece           | +35.29/+24.42      |               |
| 1,453                 |                               | Italy            | +43.28/+11.02      |               |
| 1,482                 |                               | Australia        | −31.56/+115.50     |               |
| MTE                   |                               | Italy            | ?                  |               |
| RIAH                  | Italy                         | ?                |                    |               |
| 86IT1                 | Sorrento, Italy               | +40,62/+14,37    |                    |               |
| GÖ665 (Accession 665) | Botanical Garden of Göttingen | ?                |                    |               |
| 1GR1                  | Samos, Greece                 | +37,78/+26,83    |                    |               |
| TAAL-1                | Taguement, Algeria            | ?                |                    |               |

**Table S2. Genes sequenced and PCR primers used. (a) the primers are designed based on *A. thaliana* sequence; (b) designed based on *C. rubella* BAC sequence. Bold primers were used only for sequencing**

| No. | Gene                            | Primers                                                                                                                                                                                                                                                                                                                                                                                                                                                                                                                                                                                                                                                                                                                                                                                                                                                                                                                                                                                                                                                                                                                              | Fragment size, bp                                        | Distance from SRK ( <i>A. thaliana</i> — <i>C. rubella</i> , kb) |
|-----|---------------------------------|--------------------------------------------------------------------------------------------------------------------------------------------------------------------------------------------------------------------------------------------------------------------------------------------------------------------------------------------------------------------------------------------------------------------------------------------------------------------------------------------------------------------------------------------------------------------------------------------------------------------------------------------------------------------------------------------------------------------------------------------------------------------------------------------------------------------------------------------------------------------------------------------------------------------------------------------------------------------------------------------------------------------------------------------------------------------------------------------------------------------------------------|----------------------------------------------------------|------------------------------------------------------------------|
| 1   | At4 g17760*                     | G16211 ATT TGC CAG CTC GAT AAT GTT C G16212 GGT ATC ACA ATG AAA GGC AAG G                                                                                                                                                                                                                                                                                                                                                                                                                                                                                                                                                                                                                                                                                                                                                                                                                                                                                                                                                                                                                                                            | 978                                                      | 1,496-?                                                          |
| 2   | At4 g18975*                     | G16020 CTG GGA AAT TGG ACA GAG GTT A G16021 TCT TCT TGG TTG AGT TCC CTG A                                                                                                                                                                                                                                                                                                                                                                                                                                                                                                                                                                                                                                                                                                                                                                                                                                                                                                                                                                                                                                                            | 990                                                      | 990-?                                                            |
| 3   | At4 g20130*                     | G15788 TCA CTT CTG GCG GCT CTA TG G15789 TGC GAG AAT CTC CAG AGA AC                                                                                                                                                                                                                                                                                                                                                                                                                                                                                                                                                                                                                                                                                                                                                                                                                                                                                                                                                                                                                                                                  | 958                                                      | 504-?                                                            |
| 4   | At4 g21150*                     | G15708 GCA CCA GCT CTT AGT GTG AAG C G15709 GCT CGA CCT GTG ACT CAT GTT T                                                                                                                                                                                                                                                                                                                                                                                                                                                                                                                                                                                                                                                                                                                                                                                                                                                                                                                                                                                                                                                            | 867                                                      | 100-?                                                            |
| 5   | At4 g21350 (U-box) <sup>†</sup> | <i>C.grandiflora</i> G14552 GTC ATC CTC CAA TCG GGT CAT ACT T G14553 CTC ATT ATC TTC CAA ACC AAA GCA T <i>C. rubella</i> G18406 TTT CGG GTT CTC TGC TCT GT G18407 TTC CAT TTT CAG CAC CAA ATC                                                                                                                                                                                                                                                                                                                                                                                                                                                                                                                                                                                                                                                                                                                                                                                                                                                                                                                                        | 943/1,283                                                | 27-32                                                            |
| 6   | SCR <sup>†</sup>                | G15065 CGT CAA TGT CGT TCA TTT GGT T G15066 TGT TGA AAA ATA GCC ACG GTT C                                                                                                                                                                                                                                                                                                                                                                                                                                                                                                                                                                                                                                                                                                                                                                                                                                                                                                                                                                                                                                                            | 857                                                      | 2-14                                                             |
| 7   | At4 g21370 (SRK) <sup>†</sup>   | <i>C.grandiflora</i> —General primers for S-domain 13 seq2F<br>GATGGAMTCCGRITTTAKYGGCAT SLGR<br>ATCTGACATAAAGATCTTGACC ClassB1000-F1<br>AATGGCAATTTCTGTCT ClassB600-R1 CCCGACCCACCATCTTGG ClassA3.1000-F1 GGCAATTTCTGTGCTAAGG SLGR<br><i>C.grandiflora</i> — <i>C. rubella</i> allele primers SRKrub5endF—TCCTGCGTACTCGATCAATG SRKrub3endR—AGTACAGCTCAACCGCGTC SRKrub3endF—CGAGGATCGGATTCTGTC SRKrubex2R—CGGAATAGCTCTTGCTTGC SRKrubex2F—GTAATAGGTCTGATCGTAGG SRKrubex5R—TTCCAAAGATCCTTGCCATC SRKrubex5F—TGCGATTTGATATCACC AATG SRKrubex7R—AAGGACCGAGAGGGTG <i>C. rubella</i> Fragment1 G11587 CTG CTG GGA AGT TGA AAA TAA ATA A G11588 GAA TAG CTC TTG CTT GCT TCT GTT T Fragment2 G11589 CCA CAG GTC AAG AAC TTT ATG TCA A G11590 TAC CTA CCA TCA AGA GCG ATA AAC T G11793 TCA GTG GTT GCA GAG CTT CTT G G11794 ACC AGT CCG GCA GTC ACA ATA TG G11795 TTG GTC AAC AAC ACT GTC ATA TTC G11796 TCT CTT GTG GTT GGA ATG TTG ATG G11941 GCC AAT TTA GCA TAT AGC TTC GAG G12031 TCA GCG GAA GTT CTA GTT CGT CTG T G12182 ATC GCC AGC AAA ATA TAC AAT ATA A G12496 CTT GGA AAA TTT AAG CCT CGA TTC G12497 ATG TGA GGT GCT GAA AAG TGA CTC | 600, 800, 900, 970, 1,290, 960, 850, 4,103, 2,263, 2,673 | 0-0                                                              |
| 8   | At4 g21380 (ARK3) <sup>†</sup>  | G15576 GGT TGC AAA CAG AGA CCA TCC T G15671 TCC ATA TCA CAC AAC CTG ACC C                                                                                                                                                                                                                                                                                                                                                                                                                                                                                                                                                                                                                                                                                                                                                                                                                                                                                                                                                                                                                                                            | 930                                                      | 2-2                                                              |
| 9   | At4 g21430 <sup>†</sup>         | G15672 CAA TCT AGT AGT AGT GAC AGT C G15673 ATT TAC TCT CCC TCC CCG TTT C                                                                                                                                                                                                                                                                                                                                                                                                                                                                                                                                                                                                                                                                                                                                                                                                                                                                                                                                                                                                                                                            | 969                                                      | 21-22                                                            |
| 10  | At4 g21580*                     | G15710 TGC TCT TCT TTC TGG AGG AGG T G15711 CGA CTT CCC TTA CAA CAA CTG C                                                                                                                                                                                                                                                                                                                                                                                                                                                                                                                                                                                                                                                                                                                                                                                                                                                                                                                                                                                                                                                            | 897                                                      | 89-?                                                             |
| 11  | At4 g22720*                     | G15790 GCA CAT CAC CAT CTT GAC CA G15791 GCG AAA TCG TTG TGT AAA GG                                                                                                                                                                                                                                                                                                                                                                                                                                                                                                                                                                                                                                                                                                                                                                                                                                                                                                                                                                                                                                                                  | 989                                                      | 554-?                                                            |
| 12  | At4 g23840*                     | G16022 GTT ACG GAT GCT GGT ATG AAG C G16023 CAC ATG CTA CAA ACC CAA CAG A                                                                                                                                                                                                                                                                                                                                                                                                                                                                                                                                                                                                                                                                                                                                                                                                                                                                                                                                                                                                                                                            | 999                                                      | 1013-?                                                           |
| 13  | At4 g25100*                     | G16213 GGA AAA CAT CAC AGA GCT TAC G G16214 CAA GTC TGG CAC TTA CAG CTT C                                                                                                                                                                                                                                                                                                                                                                                                                                                                                                                                                                                                                                                                                                                                                                                                                                                                                                                                                                                                                                                            | 912                                                      | 1510-?                                                           |
| 14  | At4 g00650 (FRI)*               | G-9905 TGA AGG AGG ATT AGC TGT GGC G-9906 TCG TCT CTT TGA CTA GGA AAG                                                                                                                                                                                                                                                                                                                                                                                                                                                                                                                                                                                                                                                                                                                                                                                                                                                                                                                                                                                                                                                                | 955                                                      | 11112.5 kb-?                                                     |
| 15  | At1 g77120*                     | G16230 GTG ATG GAG GAA GTG GAG GTT G16456 TTG ATC TCT GAG AAT GGC ACT G G16231 TGA TCT TCT CAG GAT CAA CAC C                                                                                                                                                                                                                                                                                                                                                                                                                                                                                                                                                                                                                                                                                                                                                                                                                                                                                                                                                                                                                         | 1405                                                     | -                                                                |
| 16  | AT5G10140 (FLC)*                | G10287 TCT TAA AGC CTT GGT AAT ACA AAC A G11096 AAG ATC ACC ATG TTC AGC AAT CA                                                                                                                                                                                                                                                                                                                                                                                                                                                                                                                                                                                                                                                                                                                                                                                                                                                                                                                                                                                                                                                       | 915                                                      | -                                                                |
| 17  | At5 g35840 (PHYC)*              | G-9910 TGG TGT ATG CTT CAT TGG ACA G-10442 TGC ACT TTA CGT TCT ATG CTG A                                                                                                                                                                                                                                                                                                                                                                                                                                                                                                                                                                                                                                                                                                                                                                                                                                                                                                                                                                                                                                                             | 949                                                      | -                                                                |
| 18  | matK*                           | Fragment1 G-20636 GTT GCC CGG GAT TCG AA G-20639 CCT TTC ATA CAT TAT GTT AG G-20637 ATT AGG GCA TCC CAT TAG TA G-20638 TTA ACA CAA CAA AGA CGA AG Fragment2 G-20641 GTA ATA TTT CCA TTT ATG CAT C G-20642 GAG TAC TCG GCT TTT AAG TG G-20640 GTA CTT GCT CAT GAT CAT GG G-20643 GAT TCT GTT CAT ACA TTC GCA                                                                                                                                                                                                                                                                                                                                                                                                                                                                                                                                                                                                                                                                                                                                                                                                                          | 2571, 1,004, 1,612,                                      | -                                                                |

**Table S3. Summary of diversity parameters**

| Locus             | Distance from SRK in A. <i>thaliana</i> and <i>C. rubella</i> (bp) | Alleles sequenced ( <i>rubella</i> / <i>grandiflora</i> ) | Exons only $\pi$ |                    | Introns only $\pi$ |               | Tajima's D    | Singletons | Informative sites | Fixed differences | Shared differences | Private polymorphisms-<br>rubella | Private polymorphisms-<br>grandiflora |
|-------------------|--------------------------------------------------------------------|-----------------------------------------------------------|------------------|--------------------|--------------------|---------------|---------------|------------|-------------------|-------------------|--------------------|-----------------------------------|---------------------------------------|
|                   |                                                                    |                                                           | Total (bp)       |                    | Syn                | Non-syn       |               |            |                   |                   |                    |                                   |                                       |
|                   |                                                                    |                                                           | rubella          | <i>grandiflora</i> |                    |               |               |            |                   |                   |                    |                                   |                                       |
| At4 g17760        | 1496                                                               | 25/14                                                     | 0 (493)          | 0                  | 0                  | 0             | 0 (456)       | —          | 0                 | 0                 | 5                  | 0                                 | 0                                     |
| grandiflora       |                                                                    | 0.07365                                                   | 0.07336 (477)    | 1.16               | 5                  | 0             | 65            | —          | 0                 | 0                 | 3                  | 0                                 | 0                                     |
| At4 g18975        | 990-?                                                              | 25/14                                                     | 0 (460)          | 0                  | 0                  | 0             | 0.00042 (384) | -1.51      | 2                 | 0                 | 3                  | 0                                 | 2                                     |
| grandiflora       |                                                                    | 0.02285                                                   | 0.01856 (445)    | -1.13              | 29                 | 9             | —             | —          | 0                 | 0                 | 2                  | 0                                 | 32                                    |
| S2 (At4 g20130)   | 504-?                                                              | 25/14                                                     | 0.00019 (423)    | 0.00093            | 0                  | 0             | 0.00032 (482) | -1.21      | 1                 | 1                 | 2                  | 0                                 | 1                                     |
| grandiflora       |                                                                    | 0.06006                                                   | 0.02583 (564)    | 0.59               | 10                 | 36            | —             | —          | 0                 | 0                 | 0                  | 0                                 | 43                                    |
| At4 g21150        | 100-?                                                              | 25/14                                                     | 0.01385 (443)    | 0.00185            | 0.00108            | 0.00278 (409) | —             | -2.46***   | 18                | 1                 | 0                  | 13                                | 1                                     |
| grandiflora       |                                                                    | 0.02218                                                   | 0.01124 (375)    | 0.00185            | 18                 | 14            | 0.00278 (409) | —          | 0                 | 0                 | 0                  | 13                                | 6                                     |
| Ubox (At4 g21350) | 27-32                                                              | 25/14                                                     | 0.01132 (438)    | -1.06              | 0                  | 0             | No intron     | -1.51      | 2                 | 0                 | 0                  | 0                                 | 2                                     |
| grandiflora       |                                                                    | 0.05234                                                   | 0.00017 (936)    | 0.00069            | 20                 | 28            | No intron     | -0.69      | 1                 | 1                 | 1*                 | 0                                 | 2                                     |
| SCR               | 2-14                                                               | 25/1                                                      | No intron        | -0.36              | 0                  | 0             | 0.00049 (736) | -0.69      | 1                 | 1                 | 1*                 | —                                 | —                                     |
| grandiflora       |                                                                    | only 1 sequence                                           | 0 (67)           | 0                  | 0                  | 0             | —             | —          | —                 | —                 | —                  | —                                 | —                                     |
| SRK(S domain)     | 0                                                                  | 25/12                                                     | 0.00029 (1306)   | 0.00126            | 0                  | 0             | No intron     | 0.72       | 0                 | 1                 | ≈6†                | 0†                                | ≈7†                                   |
| rubella all SRK   |                                                                    |                                                           | 0.49             | 0.49               | 2                  | 5             | —             | —          | —                 | —                 | —                  | 0†                                | ≈5†                                   |
| grandiflora       |                                                                    | 0.99986                                                   | No intron        | -0.77              | 79                 | 236           | —             | —          | 0                 | 0                 | 4                  | 0                                 | 65                                    |
| ARK3 (At4 g21380) | 2                                                                  | 25/14                                                     | 0 (839)          | 0                  | 0                  | 0             | No intron     | —          | 0                 | 0                 | 4                  | 0                                 | 0                                     |
| grandiflora       |                                                                    | 0.05860                                                   | No intron        | -1.10              | 40                 | 31            | —             | —          | 0                 | 0                 | 0                  | 0                                 | 65                                    |
| B160 (At4 g21430) | 21-22                                                              | 25/14                                                     | 0 (537)          | 0                  | 0                  | 0             | 0.00153 (271) | -0.48      | 1                 | 1                 | 1                  | 0                                 | 2                                     |
| grandiflora       |                                                                    | 0.00561                                                   | 0.00271          | -1.86*             | 21                 | 3             | —             | —          | 0                 | 0                 | 0                  | 0                                 | 20                                    |
| At4 g21580        | 89-?                                                               | 25/14                                                     | 0 (463)          | 0                  | 0                  | 0             | 0.00217 (268) | 0.21       | 1                 | 1                 | 1                  | 0                                 | 1                                     |
| grandiflora       |                                                                    | 0.03871                                                   | 0.06153 (357)    | 0.76               | 6                  | 53            | —             | —          | 0                 | 0                 | 0                  | 0                                 | 52                                    |
| S12 (At4 g22720)  | 554-?                                                              | 25/14                                                     | 0.00065 (736)    | 0                  | 0.00085            | 0             | 0 (182)       | 1.35       | 0                 | 1                 | 0                  | 0                                 | 1                                     |
| grandiflora       |                                                                    | 0.05583                                                   | 0.04676 (183)    | 0.29               | 13                 | 40            | —             | —          | 0                 | 0                 | 0                  | 0                                 | 42                                    |
| At4 g23840        | 1013-?                                                             | 25/14                                                     | 0.00022 (365)    | 0                  | 0.00029            | 0.00146 (435) | —             | -0.25      | 1                 | 2                 | 0                  | 0                                 | 1                                     |
| grandiflora       |                                                                    | 0.01764                                                   | 0.00733 (468)    | -1.07              | 18                 | 11            | —             | —          | 0                 | 0                 | 0                  | 0                                 | 26                                    |
| At4 g25100        | 1510-?                                                             | 25/14                                                     | 0.00494 (380)    | 0.01594            | 0.00184            | 0.00434 (457) | —             | 1.38       | 2                 | 8                 | 0                  | 6                                 | 3                                     |
| grandiflora       |                                                                    | 0.03083                                                   | 0.02630 (488)    | -0.32              | 28                 | 31            | —             | —          | 0                 | 0                 | 0                  | 6                                 | 53                                    |
| Adh (At1 g77120)  | Chr. 1 in A. thaliana                                              | 25/14                                                     | 0.00029 (808)    | 0.00128            | 0                  | 0             | 0 (467)       | -1.21      | 1                 | 1                 | 1                  | 0                                 | 2                                     |
| grandiflora       |                                                                    | 0.01478                                                   | 0.01594 (458)    | -0.09              | 10                 | 21            | —             | —          | 0                 | 0                 | 0                  | 0                                 | 25                                    |
| FRI (At4 g00650)  | Chr. 4 in A. thaliana                                              |                                                           | 0.00260 (148)    | 0.01061            | 0                  | 0             | 0.01163 (752) | 1.42       | 1                 | 23                | 0                  | 14                                | 5                                     |
| PHYC (At5 g35840) | Chr. 5 in A. thaliana                                              |                                                           | 0.01571 (148)    | 0.04304            | 0.00726            | 0.1982 (780)  | —             | -0.14      | 19                | 30                | 0                  | 18                                | 0                                     |
| FLC (At5 g10140)  | Chr. 5 in A. thaliana                                              |                                                           | 0.01241 (683)    | 0.03273            | 0.00694            | 0.01131 (141) | —             | 3.46***    | 0                 | 19                | 0                  | 0                                 | 0                                     |
| LD (At4 g02560)   | Chr. 4 in A. thaliana                                              |                                                           | 0.01746 (683)    | 0.05508            | 0.00737            | 0.01347 (141) | —             | 0.61       | 12                | 25                | 2                  | 0                                 | 14                                    |
| PI (At5 g20240)   | Chr. 5 in A. thaliana                                              |                                                           | 0.00039 (204)    | 0                  | 0.000531           | 0.00024 (645) | —             | -1.21      | 1                 | 1                 | 2                  | 0                                 | 2                                     |
| CRY (At4 g08920)  | Chr. 4 in A. thaliana                                              |                                                           | 0.00219 (204)    | 0.00475            | 0.00143            | 0.00737 (647) | —             | -1.07      | 12                | 6                 | —                  | —                                 | —                                     |
| matK              | chloroplast                                                        |                                                           | 0                | 0                  | 0                  | 0.00177 (270) | —             | 1.12       | 0                 | 1                 | —                  | —                                 | —                                     |
|                   |                                                                    |                                                           | —                | —                  | —                  | 0.00219       | —             | -0.62      | 1                 | 9                 | —                  | —                                 | —                                     |
|                   |                                                                    |                                                           | 0                | 0                  | 0                  | 0             | —             | —          | 0                 | 0                 | —                  | —                                 | —                                     |
|                   |                                                                    |                                                           | 0.00028 (1489)   | 0                  | 0.00036            | 0 (796)       | —             | -0.48      | 1                 | 1                 | 0                  | 0                                 | 2                                     |
|                   |                                                                    |                                                           | 0.00058 (1489)   | 0.00086            | 0.00050            | 0.00147 (796) | —             | 0.21       | 1                 | 3                 | 0                  | 0                                 | 4                                     |

\*Only 224 overlapping basepairs, with 1 difference between *C. rubella* and *C. grandiflora*. *C. rubella* has no polymorphisms in this region.

†Only 2 *C. grandiflora* sequences as well as ≈420 bp missing from one of the *C. grandiflora* sequences.



**Table S4. ADH diversity analyses in different species**

| No | Species                    | N  | Length (bp) | S  | $\pi$   | $\theta_W$ |
|----|----------------------------|----|-------------|----|---------|------------|
| 1  | <i>A. thaliana</i>         | 19 | 1279        | 36 | 0.00814 | 0.00812    |
| 2  | <i>A. lyrata</i>           | 11 | 1284        | 18 | 0.00355 | 0.00487    |
| 3  | <i>C. rubella</i>          | 25 | 1262        | 2  | 0.00018 | 0.00042    |
| 4  | <i>C. grandiflora</i>      | 14 | 1277        | 33 | 0.00845 | 0.00833    |
| 5  | <i>C. bursa-pastoris</i> A | 4  | 627         | 12 | 0.00970 | 0.01046    |
| 6  | <i>C. bursa-pastoris</i> B | 4  | 625         | 1  | 0.00080 | 0.00087    |
